# Supplementary material for: Sequential perturbations to mouse corticogenesis following in utero maternal immune activation
Source: eLife. 2021 Mar 5;10:e60100. doi: 10.7554/eLife.60100 (PMC7979158; doi:10.7554/eLife.60100)
Supplement: Supplementary file 21. — Numbers represent samples analyzed for at least one of the individual listed markers or co-stains. Details of specific use of individual samples can be found in supplementary file 22. [file elife-60100-supp21.xlsx]

## Sheet: Sheet1
		N for Proliferation markers (PH3, KI67, SOX9, PAX6, TBR2)	N for Lamination markers (TBR1/CTIP2, SATB2, CUX1, TBR1/SATB2)	N for Cell Specificity markers (GFAP, OLIG2, DLX2, GAD6, PDGFRa, SOX2)
MIA	Number of litters	6	5	5
	Males	8	6	4
	Females	10	7	6
Control	Number of litters	3	3	3
	Males	7	5	3
	Females	6	7	5
