# Supplementary material for: Sequential perturbations to mouse corticogenesis following in utero maternal immune activation
Source: eLife. 2021 Mar 5;10:e60100. doi: 10.7554/eLife.60100 (PMC7979158; doi:10.7554/eLife.60100)
Supplement: Supplementary file 22. [file elife-60100-supp22.xlsx]

## Sheet: Sheet2
Treatment	Sample	Sex	Pax6	Ki67	Tbr2	Ph3	Sox9	Tbr1/Ctip2	Satb2	Cux1	GFAP	Olig2	Dlx2	Gad67	Pdgfra	Sox2	Tbr1/Satb2	GA (Dapi)
MIA	4042_8	M
MIA	4042_11	M
MIA	4042_7	F
Control	4043_7	M
Control	4043_10	M
Control	4043_9	F
MIA	4046_1	F
MIA	4046_2	F
MIA	4049_5	M
MIA	4049_7	M
MIA	4049_6	F
MIA	4049_8	F
Control	4050_6	F
Control	4050_7	F
Control	4050_9	M
Control	4050_8	F
Control	4050_10	F
MIA	4047_8	M
MIA	4047_9	M
MIA	4053_8	M
MIA	4053_9	F
MIA	5618_3	M
MIA	5618_5	F
MIA	5618_6	F
MIA	5618_7	F
MIA	5618_1	F
MIA	5618_2	M
Control	5806_3	M
Control	5806_5	F
Control	5806_1	F
Control	5806_2	M
Control	5806_4	M
Control	5806_8	M
Control	5806_9	F
